# Supplementary material for: Comprehensive Analysis of the Immune and Prognostic Implication of COL6A6 in Lung Adenocarcinoma
Source: PubMed Central journal article supplement (PMC7968342; doi:10.3389/fonc.2021.633420), 2021-02-26
Supplement: Image_2.pdf [file Image_2.pdf]

**A**

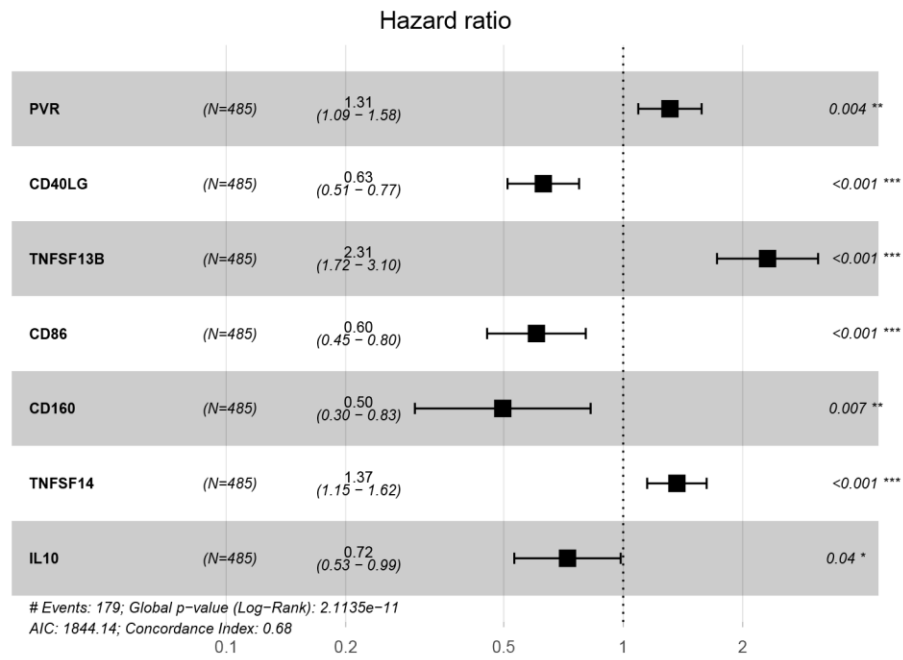

**B**

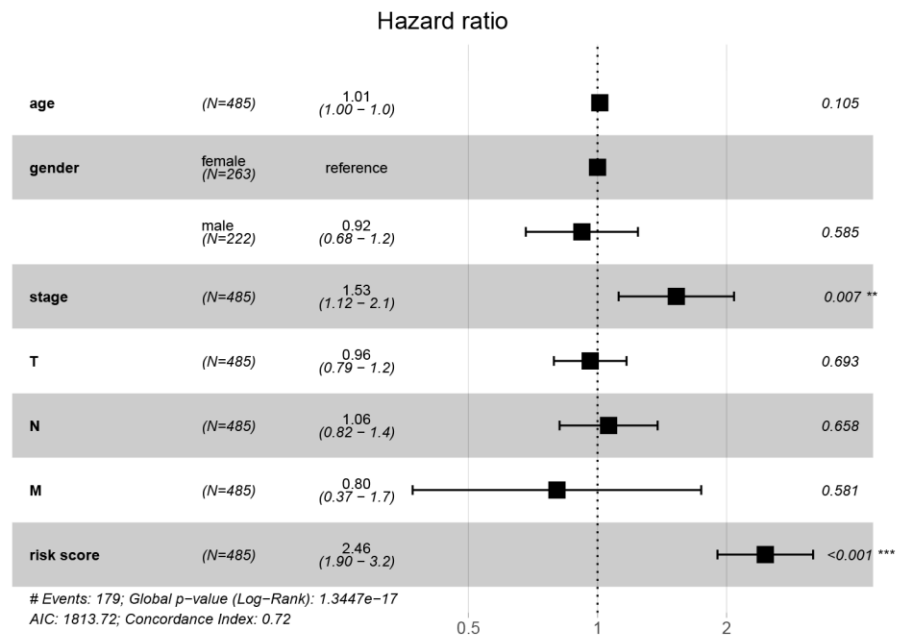

**Supplementary Figure 2.** Cox regression analyses of gene signatures and risk score. **(A)** The hazard ratios of genes integrated into the prognostic signature. **(B)** Multivariate Cox regression analysis of the risk score in LUAD regarding OS.
